# Supplementary material for: CYP450 core involvement in multiple resistance strains of Aedes aegypti from French Guiana highlighted by proteomics, molecular and biochemical studies
Source: PLoS One. 2021 Jan 11;16(1):e0243992. doi: 10.1371/journal.pone.0243992 (PMC7799788; doi:10.1371/journal.pone.0243992)
Supplement: S3 Table — (XLSX) [file pone.0243992.s006.xlsx]

## Sheet: Feuil1
S3 Table-List of proteins that were statistically more or less abundant in IR13
Samples are compared to NO samples.
For each protein, UniProt accession number, the gene associated name, the log2(foldchange)
(i.e. Log2(mean LFQ IR13/mean LFQ NO) and the adjusted p-value are presented.
Proteins detected exclusively in IR13 samples
Uniprot accession	Gene names	Cytochrome P450 ?
J9E9J9	23687430 AaeL_AAEL017010	no
J9HGZ2	23687484 AaeL_AAEL017064	no
J9HGL9	AaeL_AAEL017346	no
J9HGW5	AaeL_AAEL017154	no
J9HYQ9	23687721 AaeL_AAEL017301	no
J9HZ33	23687963 AaeL_AAEL017543	no
P42660	VCP AAEL006563	no
Q16SG5	AAEL010594 Aael_AAEL010594	no
Q0C7C4	AAEL000016	no
Q175T3	AAEL006558	no
Q0IEC0	AAEL011429	no
Q0IEF0	5573964 AAEL010819	no
Q0IEF4	AAEL010747	no
Q0IER5	5570138 AAEL008100 Aael_AAEL008100	no
Q0IEU8	AAEL007985	no
Q0IF21	5568744 AAEL007090	no
Q0IF54	AAEL006530 AAEL801215	no
Q0IF60	AAEL006510	no
Q0IF73	5567977 AAEL006400	no
Q0IFB6	5567155 AAEL005909	no
Q0IFD5	AAEL005715	no
Q0IFE2	AAEL005719	no
Q1DGY4	5579447 AAEL015425	no
Q0IFK8	AAEL004697	no
Q0IFW3	5563781 AAEL003945	no
Q0IG76	AAEL003055	no
Q0IGA6	5576962 AAEL003070	no
Q0IGF8	5576321 AAEL000394	no
Q16EA5	AAEL015304	no
Q16PT7	AAEL011538	no
Q16EJ3	AAEL015142	no
Q16ER5	AAEL014556 AAEL015053	no
Q16F46	AAEL014901	no
Q16F58	CYP6BB2 5565578 AAEL014893	Yes
Q16FD1	AAEL014816	no
Q16FG6	AAEL014762	no
Q16FH7	AAEL014753	no
Q16FX9	AAEL014600	no
Q16G25	AAEL014549	no
Q16G64	AAEL014506	no
Q16G74	AAEL014500	no
Q16G83	AAEL014493	no
Q16GD0	AAEL014423	no
Q16GZ3	AAEL014209	no
Q17AV9	5566109 AAEL005192	no
Q16HG4	AAEL014040	no
Q16HH8	AAEL014022	no
Q16HK5	5579054 AAEL013998	no
Q16HQ8	AAEL013948	no
Q1HRT2	AAEL004809	no
Q16HV7	AAEL013890	no
Q16I05	5578727 AAEL013842	no
Q16I20	AAEL013825	no
Q16I86	AAEL013760	no
Q16I95	AAEL013752	no
Q16IF1	AAEL013700	no
Q16IG0	AAEL013688	no
Q16IK3	AAEL013623	no
Q16IR9	AAEL013567	no
Q16IU6	AAEL013543	no
Q16IW4	AAEL013522	no
Q16J69	AAEL013429	no
Q16J98	5577818 AAEL013392	no
Q16JY4	AAEL013177	no
Q16K52	AAEL013114	no
Q16K74	AAEL013103 Aael_AAEL013103	no
Q16KA5	AAEL013067	no
Q16KM7	AAEL012940	no
Q16KV3	AAEL012867	no
Q16LN6	AAEL012569	no
Q16LV4	AAEL012506	no
Q172L7	AAEL007335	no
Q16M32	AAEL012440	no
Q16M46	5576273 AAEL012426	no
Q16M78	5576199 AAEL012387	no
Q16ME8	AAEL012329	no
Q16MG8	AAEL012307	no
Q16MT2	5575957 AAEL012195	no
Q16NG1	AAEL011973	no
Q16NI8	AAEL011962	no
Q16NL2	AAEL011937	no
Q16NQ4	AAEL011901	no
Q16NV1	CYP315A1 AAEL011850	no
Q16NX8	5575423 AAEL011827	no
Q17GM9	AAEL002970	no
Q16P42	AAEL011762	no
Q16P44	AAEL011765	no
Q16P52	AAEL011754	no
Q16P54	AAEL011748	no
Q16PC7	AAEL011686	no
Q16SE0	AAEL010617	no
Q16PD9	AAEL011676	no
Q16PF1	AAEL011658	no
Q16PH4	AAEL011638	no
Q16PP7	AAEL011577	no
Q16PV1	AAEL011518	no
Q16Q69	5574743 AAEL011389	no
Q16Q98	AAEL011353	no
Q16U99	AAEL009968	no
Q16RE1	AAEL010986	no
Q16RH3	5574140 AAEL010949	no
Q16RI0	AAEL010951	no
Q16RI1	AAEL010953	no
Q16RL5	AAEL010912	no
Q16RM5	5574067 AAEL010903	no
Q16RP1	5574049 AAEL010896	no
Q16SA1	AAEL010673	no
Q16SB6	5573648 AAEL010642	no
Q16SC5	AAEL010630	no
Q16SL5	AAEL010571	no
Q16SV4	AAEL010483	no
Q16T94	5573251 AAEL010349	no
Q16TF5	AAEL010254	no
Q16TR5	CYP4AR2 AAEL010154	Yes
Q16TZ5	5572855 AAEL010075	no
Q16U79	AAEL009991	no
Q16UN2	5572521 AAEL009836	no
Q16V27	5572309 AAEL009703	no
Q16V41	5572320 AAEL009712	no
Q16V74	5572233 AAEL009669	no
Q16VH7	AAEL009561	no
Q16VQ0	AAEL009469	no
Q16VV3	SCRBQ2 AAEL009423	no
Q16W05	AAEL009372	no
Q16W42	AAEL009342 AAEL801146	no
Q16W93	5571771 AAEL009288	no
Q16WB5	AAEL009271	no
Q16WG1	AAEL009216	no
Q16WH6	AAEL009219	no
Q16WQ5	CYP6Z7 AAEL009130	Yes
Q16WR9	CYP6N12 5571529 AAEL009124	Yes
Q16WS2	CYP6N9 5571549 AAEL009121	Yes
Q16X18	AAEL009038	no
Q16XA1	5571322 AAEL008959	no
Q16XL3	AAEL008853	no
Q16XR0	AAEL008814	no
Q16XR7	5571057 AAEL008811	no
Q16XZ1	5570989 AAEL008719	no
Q16Y52	AAEL008663	no
Q16Y92	AAEL008624	no
Q16YB4	5570821 AAEL008594	no
Q16YB8	AAEL008599	no
Q16YK1	AAEL008507	no
Q16YN5	5570666 AAEL008491	no
Q16YT7	AAEL008425	no
Q16ZN5	AAEL008123	no
Q170J3	AAEL007892	no
Q170S2	5569672 AAEL007822	no
Q170X1	AAEL007747	no
Q171F6	5569476 AAEL007655	no
Q171I8	REL2 AAEL007624	no
Q171P3	5569383 AAEL007578	no
Q171S6	5569309 AAEL007556	no
Q171Z2	AAEL007501	no
Q172A2	AAEL007470	no
Q172B3	5569203 AAEL007469	no
Q172C6	AAEL007436	no
Q172S7	AAEL007290	no
Q172U4	AAEL007275	no
Q172Z1	5568944 AAEL007243	no
Q173A0	AAEL007219	no
Q173I5	5568790 AAEL007130	no
Q173S0	AAEL007031	no
Q173S6	5568679 AAEL007034	no
Q173Y2	AAEL006962	no
Q174C8	AAEL006940	no
Q174N5	AAEL006843	no
Q174W5	AAEL006776	no
Q175C9	5568266 AAEL006688	no
Q175H5	5568224 AAEL006654	no
Q175J2	AAEL006652	no
Q175L6	AAEL006622	no
Q175X1	AAEL006499	no
Q175X5	5568054 AAEL006480	no
Q176F8	AAEL006373	no
Q176K3	5567885 AAEL006359	no
Q176K4	AAEL006344	no
Q176W0	5567651 AAEL006235	no
Q177C2	5567581 AAEL006174	no
Q177G5	AAEL006153	no
Q177G9	5567527 AAEL006134	no
Q178E5	AAEL005932	no
Q178E8	AAEL005929	no
Q178L8	5579830 AAEL005857	no
Q178N6	AAEL005826	no
Q178P4	AAEL005805	no
Q179C8	AAEL005690	no
Q179F3	AAEL005653	no
Q179T2	AAEL005527	no
Q17A64	5566457 AAEL005428	no
Q17AA2	AAEL005343	no
Q17AI4	AAEL005291	no
Q17AS9	AAEL005177	no
Q17B32	AAEL005113	no
Q17B53	5565948 AAEL005075	no
Q17BA6	5565830 AAEL005016	no
Q17BF6	AAEL004997	no
Q17BG7	AAEL004970	no
Q17BP0	AAEL004896	no
Q17BP5	AAEL004911	no
Q17CA3	AAEL004630	no
Q17CI8	AAEL004553	no
Q17CW4	AAEL004414	no
Q17CX7	AAEL004397	no
Q17D38	AAEL004342	no
Q17DE2	AAEL004237	no
Q17DI5	AAEL004134	no
Q17DQ0	5564141 AAEL004120	no
Q17DT3	5564034 AAEL004053	no
Q17DV3	5563955 AAEL004040	no
Q17E20	AAEL003975	no
Q17E79	AAEL003895	no
Q17E92	AAEL003876	no
Q17EC1	AAEL003864	no
Q17ED4	AAEL003855	no
Q17EH7	AAEL003774	no
Q17EN7	5578855 AAEL003709	no
Q17F50	5578550 AAEL003573	no
Q17F89	AAEL003489	no
Q17F92	5578218 AAEL003454	no
Q17FK3	AAEL003384	no
Q17FY5	5577637 AAEL003237	no
Q17G02	IKK1 AAEL003245	no
Q17GD5	AAEL003123	no
Q17GJ0	5580266 AAEL003001	no
Q17GK8	AAEL002971	no
Q17H00	AAEL002836	no
Q17HF0	AAEL002723	no
Q17HV0	AAEL002560	no
Q17HZ1	AAEL002529	no
Q17I46	5574797 AAEL002486	no
Q17ID1	AAEL002369	no
Q17ID2	AAEL002386	no
Q17IG1	AAEL002385	no
Q17IT5	AAEL002256	no
Q17IV6	5573941 AAEL002232	no
Q17J48	AAEL002176	no
Q17J58	5573604 AAEL002108	no
Q17J88	5573574 AAEL002118	no
Q17KB5	AAEL001746	no
Q17KK8	AAEL001657	no
Q17KX7	AAEL001546	no
Q17L07	AAEL001520	no
Q17L34	5570907 AAEL001480	no
Q17LJ2	5570069 AAEL001334	no
Q17LX3	AAEL001201 Aael_AAEL001201	no
Q17LX7	AAEL001204	no
Q17M26	5568805 AAEL001170	no
Q17MK6	5567843 AAEL001007	no
Q17MQ1	5567469 AAEL000950	no
Q17MR9	5567455 AAEL000964	no
Q17MZ5	5567179 AAEL000922	no
Q17N17	AAEL000840	no
Q17N37	AAEL000820	no
Q17N38	AAEL000829	no
Q17NC8	AAEL000738	no
Q17NK2	AAEL000658	no
Q17NK7	5565445 AAEL000670	no
Q17NQ8	AAEL000626	no
Q17NU2	AAEL000572	no
Q17P00	5563667 AAEL000550	no
Q17P07	5578478 AAEL000477	no
Q17PA0	5577353 AAEL000435	no
Q17PM9	5573764 AAEL000257	no
Q17PN6	AAEL000278	no
Q17PR5	AAEL000300	no
Q17Q16	AAEL000164	no
Q17Q33	5567789 AAEL000147	no
Q17Q41	AAEL000115	no
Q17Q51	AAEL000146	no
Q1DGN7	AAEL015557	no
Q1DH45	AAEL015136	no
Q1HQE9	AAEL010351 AAEL010356	no
Q1HQU1	5568888 AAEL007196	no
Q1HQV0	5577385 AAEL000467	no
Q1HRD6	5572447 AAEL001831	no
Q1HRK8	5564281 AAEL014375	no
Q3LSM4	5573438 AAEL010480	no
Q8T4S2	DCE 5563621 AAEL000064	no
Proteins more abundant in IR13 samples
Uniprot accession	Gene names	Cytochrome P450 ?	fold increase	Adjusted.p.value
Q17N24	5566868 AAEL000800	no	2.633	3.34345e-05
Q17D57	5564549 AAEL004317	no	2.92789	0.000152365
Q17P32	5578455 AAEL000500	no	2.06694	0.000152365
Q16LP7	AAEL012578	no	1.30774	0.000707963
Q16MC7	5576151 AAEL012341	no	2.03501	0.000707963
D2WKE0	FOHSDR-2 AaeL_AAEL017320	no	2.17918	0.000738799
J9HJD8	AaeL_AAEL017400	no	1.67624	0.00169477
Q16M07	AAEL012457	no	1.48357	0.00169477
Q16VA1	AAEL009630	no	1.29952	0.00169477
Q16QJ8	5574626 AAEL011264	no	1.10251	0.0020399
Q173K3	AAEL007113	no	1.13041	0.0020399
Q17FG0	AAEL003424	no	1.07527	0.0020399
Q0C732	AAEL000044	no	1.06738	0.00216172
Q175Y3	AAEL006483	no	1.77758	0.00216172
Q1HRH0	5563616 CLIPB34 AAEL000028	no	1.02284	0.00216172
Q16WI7	5571685 AAEL009214	no	1.09682	0.00221964
Q170G5	AAEL007923	no	1.23223	0.00221964
Q17AK2	5566233 AAEL005258	no	1.53758	0.00221964
Q17HE7	5575750 AAEL002719	no	1.115	0.00221964
Q16GV5	5563946 AAEL014250	no	1.10099	0.0022574
Q16TK6	AAEL010204	no	1.03919	0.0022574
Q16V69	5572232 AAEL009676	no	1.05059	0.0022574
Q16Z06	5570559 AAEL008366	no	1.34977	0.00257859
Q171I3	AAEL007636	no	1.28371	0.00273086
D2WKD9	SDR-1 FOHSDR-1 AaeL_AAEL017302	no	1.69583	0.00354651
Q16L31	5576800 AAEL012783	no	1.31378	0.00354651
Q17F21	AAEL003581	no	1.39582	0.0035747
Q17N95	AAEL000766	no	1.04221	0.00359944
Q17MY3	AAEL000915	no	1.08035	0.0036844
Q16FX1	CYP9J27 AAEL014607	Yes	1.43866	0.00376602
Q16JN4	AAEL013269	no	1.11235	0.00376602
Q17E72	5563704 AAEL003909	no	1.05544	0.00400463
Q16W62	AAEL009330	no	1.04839	0.00419491
Q16FX0	CYP9J26 AAEL014609	Yes	2.03525	0.00518758
Q16JF3	AAEL013342	no	1.02888	0.00537573
Q177N2	AAEL006069	no	1.12376	0.00537573
Q17H70	5575996 AAEL002758	no	1.16841	0.00537573
Q16UX8	5572372 AAEL009760	no	1.49246	0.00539547
Q16XL5	CYP9J32 AAEL008846	Yes	2.17852	0.00540729
Q16J33	AAEL013463	no	1.04225	0.00552144
Q16SM5	AAEL003215 AAEL010546	no	1.48454	0.00597744
Q17HJ3	5575571 AAEL002658	no	1.15583	0.00654911
Q17MP9	AAEL000952	no	1.17353	0.00654911
Q17B46	5565955 AAEL005052	no	1.01197	0.00693719
Q1HRA0	AAEL000458	no	1.12151	0.0073343
Q5PY77	GSTe2 GSTE2 AAEL007951	no	1.55368	0.00809808
Q16ZN0	AAEL008149	no	1.22831	0.00831757
Q17HE8	5575751 AAEL002722	no	1.23962	0.00849484
Q16ED2	AAEL015260	no	1.54903	0.00872389
Proteins detected exclusively in NO samples
Uniprot accession	Gene names	Cytochrome P450 ?
Q1HRS4	5572523 SGP5C9 AAEL009852	no
J9HZ85	23687791 AAEL801145	no
O01949	AAEL010235	no
P18153	D7 AAEL006424	no
P50635	APY AAEL006347	no
Q0IEB0	AAEL011421	no
Q0IEZ9	5569167 AAEL007423	no
Q0IF37	AAEL006507	no
Q0IF89	5567961 AAEL006420	no
Q0IG62	AAEL003083	no
Q16E59	AAEL015411	no
Q16EE5	AAEL015238	no
Q16MX7	AAEL012156	no
Q16FA7	AAEL014842	no
Q16FD3	AAEL010486 AAEL014813	no
Q16FF1	AAEL014797	no
Q16FW3	AAEL014608	Yes
Q16G81	5564525 AAEL014492	no
Q16GM3	AAEL014331	no
Q16H37	5563838 LSM5 AAEL014169	no
Q16HK4	AAEL013999	no
Q16HU7	AAEL013896	no
Q16I73	5578590 AAEL013774	no
Q176G6	AAEL006381	no
Q16IG2	AAEL013685	no
Q16IK8	AAEL013630	no
Q16JA5	AAEL013396	no
Q16JG0	5577712 AAEL013345	no
Q16K97	5580326 AAEL013072	no
Q16LD2	5576661 AAEL012687	no
Q16LW2	Pym wibg AAEL012503	no
Q16M60	5576260 AAEL012417	no
Q16MM0	AAEL012257	no
Q16MM7	AAEL012252	no
Q16MT6	AAEL000348 AAEL012196	no
Q16MY2	AAEL012157	no
Q16N96	AAEL012054	no
Q16PH8	AAEL011630	no
Q16PT9	AAEL010572 AAEL011529	no
Q16Q94	AAEL011360	no
Q16QK7	5574616 AAEL011251	no
Q16QM0	AAEL008223 AAEL011237	no
Q16QM1	AAEL011245	no
Q16R43	5574363 AAEL011081 AAEL801156	no
Q16R67	AAEL011063	no
Q16RU1	5568730 AAEL010836	no
Q16RX3	AAEL010796	no
Q16RZ5	AAEL010776	no
Q16S89	AAEL010677	no
Q16T65	AAEL010387	no
Q16TF4	AAEL010247	no
Q16TM2	AAEL010198	no
Q16TS8	5572921 AAEL010135	no
Q16U18	5572781 AAEL010050	no
Q16U81	AAEL009992	no
Q16U82	AAEL009993	no
Q16UM7	AAEL009840	no
Q16UR7	5572477 AAEL009815	no
Q16V50	5572258 AAEL009685	no
Q16VK7	AAEL009536	no
Q16VL4	AAEL009524	no
Q16VN6	AAEL009477	no
Q16VX6	AAEL009406	no
Q16W34	AAEL009356	no
Q16W36	AAEL009346	no
Q16W98	AAEL009285	no
Q16WD5	5571738 AAEL009259	no
Q16WF5	AAEL009246	no
Q16WV1	IAP1 AAEL009074	no
Q16WV5	AAEL009085	no
Q16X19	GSTT2 AAEL009016	no
Q16XY6	5570996 AAEL008723	no
Q16YA4	5570836 AAEL008593	no
Q16YC9	AAEL008579	no
Q16YE6	AAEL008557	no
Q16YG1	5570779 AAEL008553	no
Q16YQ7	AAEL008467	no
Q16Z61	AAEL008305	no
Q16Z73	AAEL008289	no
Q16ZB4	AAEL008250	no
Q16ZR0	AAEL008080	no
Q16ZT0	5569988 AAEL008064	no
Q16ZT5	5569985 AAEL008058	no
Q170U8	5569649 AAEL007803	no
Q170V3	5569643 AAEL007790	no
Q171P1	AAEL007572	no
Q172E5	AAEL007406	no
Q172M7	AAEL007329	no
Q172R2	AAEL007308	no
Q172T3	5568987 AAEL007289	no
Q172T7	5568989 AAEL007309	no
Q172X6	AAEL007238	no
Q174P7	AAEL006822	no
Q174Q5	5568404 AAEL006819	no
Q175I0	5568219 AAEL006661	no
Q175P2	AAEL006591	no
Q175V8	AAEL006538	no
Q176D2	5567987 AAEL006450	no
Q176G1	AAEL006367	no
Q176G7	AAEL006371	no
Q176N2	AAEL006320	no
Q176N8	5567853 AAEL006308	no
Q176S8	5567698 AAEL006264	no
Q176W6	5567646 AAEL006240	no
Q177T0	AAEL006025	no
Q177V8	5567342 AAEL006006	no
Q177Z0	5579871 AAEL005985	no
Q177Z6	AAEL005975	no
Q178Q8	AAEL005813	no
Q179Z0	AAEL005472	no
Q17A06	5566526 AAEL005454	no
Q17AF1	AAEL005318	no
Q17AI9	AAEL005284	no
Q17AJ2	5566217 AAEL005279	no
Q17BH5	5565726 AAEL004951	no
Q17BI9	AAEL004942	no
Q17BQ8	5565594 AAEL004866	no
Q17BR1	5565617 AAEL004868	no
Q17C79	5565221 AAEL004682	no
Q17DU7	AAEL004075	no
Q17EB5	AAEL003837	no
Q17EH3	AAEL003781	no
Q17EN5	HOT_AEDAE AAEL003729	no
Q17FI8	5578023 AAEL003397	no
Q17FV4	AAEL003212	no
Q17FY2	AAEL003228	no
Q17G53	AAEL001852 AAEL003204	no
Q17G66	AAEL003174	no
Q17GT7	AAEL002918	no
Q17H22	AAEL002812	no
Q17HE1	SRPN23 AAEL002704	no
Q17I05	5574975 AAEL002526	no
Q17J56	AAEL002125	no
Q17J80	5573583 AAEL002130	no
Q17JB6	5573417 AAEL002069	no
Q17JB7	AAEL002056	no
Q17JM5	AAEL001974	no
Q17JP6	AAEL001940	no
Q17JW0	AAEL001913	no
Q17JY4	AAEL001853	no
Q17KF0	5572053 AAEL001706	no
Q17KJ1	5571677 AAEL001656	no
Q17L03	AAEL001507	no
Q17L08	AAEL001518	no
Q17L80	AAEL001427	no
Q17LB2	5570540 AAEL001416	no
Q17LB3	5570500 AAEL001396	no
Q17LB6	AAEL001431	no
Q17LC2	5570480 AAEL001420	no
Q17LK4	CYP9M6 CYP9M6v4 AAEL001312	Yes
Q17LW3	5569083 AAEL001209	no
Q17M86	5568552 AAEL001132	no
Q17MC9	AAEL001066	no
Q17MG2	AAEL001029	no
Q17MY1	AAEL000861	no
Q17N15	GPRMTH7 AAEL000811	no
Q17N23	5566869 AAEL000842	no
Q17N25	AAEL000832	no
Q17N49	AAEL000804	no
Q17NC0	5566287 AAEL000726	no
Q17NH7	AAEL000707	no
Q17NX6	CTL16 5563675 AAEL000533	no
Q17P67	AAEL000434	no
Q17PB1	AAEL000408	no
Q17PN1	5573763 AAEL000269	no
Q17Q11	5570002 AAEL000163	no
Q1DGK3	AAEL015598	no
Q1DH03	AAEL015386	no
Q1HQE6	5577346 AAEL000412	no
Q1HQH4	5567538 AAEL006144	no
Q1HQZ0	5564989 AAEL004521	no
Q1HRF7	AAEL003600	no
Q1HRW3	AAEL002487	no
Proteins more abundant in NO samples
Uniprot accession	Gene names	Cytochrome P450 ?	fold increase	Adjusted.p.value
Q17LX1	5569075 AAEL001215	no	-5.4972	1.51144e-05
Q1DGR4	AAEL015524	no	-3.47247	3.26497e-05
Q17PU4	5572023 AAEL000219	no	-1.75022	0.000738799
Q174S7	CYP9J8 AAEL006811	Yes	-2.92071	0.000878982
Q17DW2	AAEL004025	no	-1.55211	0.00123663
Q17N68	AAEL000757	no	-1.4545	0.00134796
Q0IFH8	5565540 AAEL004860	no	-1.14763	0.00169477
Q17J46	5580073 AAEL002158	no	-1.03135	0.00169477
Q170C6	GSTE3 5569859 AAEL007947	no	-1.418	0.0020399
J9HI66	5565699 AaeL_AAEL004931	no	-1.56769	0.00216172
Q17GA2	5577235 AAEL003150	no	-1.47878	0.00216172
Q0IFY9	AAEL003762	no	-1.18405	0.00221964
Q16JP0	AAEL013262	no	-3.01167	0.00221964
Q16R03	AAEL011112	no	-1.21291	0.00221964
Q178N8	AAEL005839	no	-1.21585	0.00221964
Q17DM8	5564130 AAEL004102	no	-1.42049	0.00221964
Q17FJ9	AAEL003368	no	-1.06772	0.00221964
Q0IFI2	AAEL004835 AAEL004858	no	-1.27935	0.0022574
Q16XA6	AAEL008936	no	-1.6145	0.0022574
Q171S4	5569333 AAEL007555	no	-1.1446	0.0022574
Q17J77	AAEL002110	no	-1.1688	0.00253378
Q16JQ7	AAEL013255 AAEL801168	no	-1.26213	0.00279443
Q16Q00	5574862 AAEL011468	no	-2.38989	0.00279443
Q17IM5	TPX4 5574193 AAEL002309	no	-1.01874	0.00308002
Q1HQH2	5572696 AAEL009964	no	-1.78651	0.00312189
Q17GS3	AAEL002898	no	-1.37187	0.00339057
Q0IFN9	AAEL004504	no	-1.13731	0.00351594
Q16WQ1	AAEL009134	no	-1.97517	0.00374313
Q171D0	AAEL007685	no	-1.03939	0.00374591
Q16ZR2	AAEL008093	no	-2.96639	0.00435381
Q171T6	AAEL007547	no	-1.01222	0.00448715
Q16ML2	AAEL012261	no	-1.0969	0.00537573
Q17BR0	5565604 AAEL004884	no	-1.32407	0.00549053
Q16XP9	5571075 AAEL008790	no	-1.05194	0.00552144
Q172M0	AAEL007349	no	-1.55504	0.00618319
Q17JH6	5573170 AAEL001964	no	-1.40427	0.00640888
Q16JK7	AAEL013290	no	-1.52035	0.00699368
Q17J67	AAEL002102	no	-1.04424	0.00713881
Q17NL5	5565450 AAEL000651	no	-1.01013	0.0072609
Q173V1	CYP6AG4 AAEL007010	Yes	-1.23099	0.00733024
P13080	MAL1 MAL I AAEL000392	no	-1.29406	0.00748147
Q16ND9	AAEL012010	no	-1.10539	0.00950583
